Anesthesiology  
58:487, 1983

## "Self-taming" with Succinylcholine and Muscle Pain

*To the Editor:*—"Self-taming" succinylcholine doses have been reported to reduce fasciculations<sup>1</sup> but not the incidence of succinylcholine-induced myalgia.<sup>2,3</sup>

I studied 50 patients, 20 to 40 years old, ASA class I, undergoing tubal ligation under identical conditions. They were divided into two groups of 25 each as follows: to Group I, a bolus dose of 100 mg succinylcholine was given; to Group II, a pretreatment dose of 10 mg followed by a bolus dose of 100 mg succinylcholine was given. All patients were ambulatory within 6 to 8 h. Anesthesia was induced in all patients with 250 mg sodium thiopental followed by succinylcholine. Anesthesia was maintained with nitrous oxide and oxygen (70:30%).

Postoperatively, assessment of muscle pain was done by a physician, who was unaware of the drug sequence, using the gradation described by Churchill-Davidson.<sup>4</sup> The results (table 1) are contradictory to the previous reports<sup>2,3</sup> since none of the patients in Group 2 had pain.

R. S. VERMA, M. S., READER  
Department of Anaesthesiology  
J.L.N. Medical College and Hospital  
Ajmer 305001, Rajasthan, India

Anesthesiology  
58:487-488, 1983

TABLE 1. Incidence of Succinylcholine-induced Myalgia (N = 25 each)

|         | Patients without Pain | Patients with Pain | Severity |          |        |
|---------|-----------------------|--------------------|----------|----------|--------|
|         |                       |                    | Mild     | Moderate | Severe |
| Group 1 | 7 (28%)               | 18 (72%)           | 7        | 9        | 2      |
| Group 2 | 25 (100%)             | —                  | —        | —        | —      |

## REFERENCES

1. Baraka A: 'Self-taming' of succinylcholine induced fasciculations. *ANESTHESIOLOGY* 46:292-293, 1977
2. Brodsky JB, Brock-Utne JG: Does "self-taming" with succinylcholine prevent postoperative myalgia? *ANESTHESIOLOGY* 50:265-267, 1979
3. Silver JN: Does "self-taming" decrease postoperative myalgia in outpatients? *ANESTHESIOLOGY* 52:98, 1980
4. Churchill-Davidson HC: Suxamethonium (succinylcholine) chloride and muscle pain. *Br Med J* 1:74-75, 1954

(Accepted for publication November 2, 1982.)

## Predicting Painful Venipunctures

*To the Editor:*—Recently, Halden and Uppfeldt<sup>1</sup> have reported the usefulness of a topical anesthetic, a lidocaine-prilocaine cream, in reducing the pain experienced by children when a venipuncture is performed to introduce an iv catheter (ivc). The procedure, however, is time-consuming and requires a dressing. Other clinicians have advocated reassurance or local subcutaneous anesthetic agents which also are time-consuming. It would be helpful to the clinician to be able to identify which patients are at risk for a particularly painful experience so that one of these interventions can be taken. Similarly, it would be useful to the researcher to be able to identify prospectively a specific population sample. Previous work<sup>2</sup> has shown prior memory of dental injection pain can be useful in predicting present experienced pain. We have used a similar method, with adults, for venipuncture pain (ivc).

Twenty-three patients (10 men, 13 women, median age 42.6 years) were seen on a hospital ward as they became available. Only those who were English-speaking and had a clear sensorium were chosen. Consent was obtained in all cases. The patients were asked to

report on a scale of 0-100 (where 0 was no pain and 100 was intolerable pain) their past average venipuncture (ivc) pain. All of the patients had had prior experiences. An experienced iv therapist then introduced, with a minimum of reassurance, an iv catheter (22-through 18-gauge) into the forearm. The patient then was asked to report the pain he experienced.

Median values for past and present pain were 25 and 10, respectively. The product-moment correlation between the two was  $r = 0.86$ ,  $P < 0.00001$ . Four patients reported moderate to severe memories, while only two of them actually experienced moderate to severe pain (>50) (see table 1).

The correlation is high enough to be of use clinically in predicting which patients would definitely require

TABLE 1. Grouped Frequency Distribution of Scores on Pain Scale

|                    | 0-25 | 26-50 | 51-75 | 76-100 |
|--------------------|------|-------|-------|--------|
| Past memory        | 12   | 7     | 1     | 3      |
| Present experience | 19   | 2     | 1     | 1      |
